# Supplementary material for: Vibrational deactivation of singlet oxygen: does it play a role in stereoselectivity during photooxygenation?
Source: Royal Society of Chemistry journal article supplement (doi:10.1039/b719387d), 2008-03-13
Supplement: b719387d.pdf [file b719387d.pdf]

## Supplementary Information

### Vibrational Deactivation Of Singlet Oxygen : Does It Play A Role In Stereoselectivity During Photooxygenation?

Marissa Solomon<sup>a</sup>, J. Sivaguru<sup>b</sup>, Steffen Jockusch<sup>a</sup>, Waldemar Adam<sup>c</sup>, Nicholas J. Turro<sup>a</sup>

<sup>[a]</sup>Department of Chemistry, Columbia University, 3000 Broadway  
New York, NY 10027, USA

<sup>[b]</sup>Department of Chemistry and Molecular Biology, North Dakota State University, Fargo, ND 58105, USA

<sup>[c]</sup>Institut für Organische Chemie, Universität Würzburg, Am Hubland,  
D-97074 Würzburg, GERMANY

E-mail: [adam@chemie.uni-wuerzburg.de](mailto:adam@chemie.uni-wuerzburg.de)

#### **i) General**

Spectrophotometric grade solvents were used as received from Aldrich. Methylene blue was used as received from Aldrich. Deuterated solvents and *L*-(*d*<sub>8</sub>)-Valine were obtained from Cambridge Isotope Labs. Chloroform-*d*, methylene chloride-*d*<sub>2</sub> and methanol-*d*<sub>4</sub> were used as received.<sup>Si,Sii</sup> Dioxetanes were analyzed using <sup>1</sup>H NMR (500Mhz, Bruker). Diols **4** were analyzed using a Hewlett-Packard 1100 HPLC, equipped with a Chiralcel OD normal phase chiral column. The *Z* and *E* enecarbamates **Z-1-h<sub>8</sub>** and **E-1-h<sub>8</sub>** and Diols **4** were synthesized as previously described.<sup>Sii</sup> Synthesis of *L*-(*d*<sub>8</sub>)-Valinol precursor to the **Z-1-d<sub>8</sub>** enecarbamate followed published procedures.<sup>Siii</sup>

#### **ii) Reaction Procedures**

##### ***a) General procedure for photooxidation of the Z-1-h<sub>8</sub>, Z-1-d<sub>8</sub> and E-1-h<sub>8</sub> enecarbamates by singlet oxygen:***

The enecarbamate was dissolved in CD<sub>2</sub>Cl<sub>2</sub> (kept over NaHCO<sub>3</sub>) and 2 mg 5,10,15,20-Tetrakis-(Pentafluorophenyl)-Porphine (TFPP) added. The solution was irradiated at -23°C (Ccl4/Dry Ice) and irradiated with a 300W lamp using <400 nm cutoff filter. The appearance of the C<sub>1</sub>-*H* peak in the dioxetane and the disappearance of the C<sub>1</sub>-*H* peak of the starting enecarbamate was monitored by low temperature <sup>1</sup>H-NMR until >90% conversion. The resulting dioxetane was maintained at -23°C and characterized by <sup>1</sup>H-NMR.

| Compound                | $^1\text{H-NMR}$ shift of Dioxetane $\text{C}_1\text{-H}$ ( $\delta$ , ppm) |
|-------------------------|-----------------------------------------------------------------------------|
| <i>Z(S,S)</i> -1- $h_8$ | 6.63                                                                        |
| <i>Z(S,S)</i> -1- $d_8$ | 6.20, 6.12                                                                  |
| <i>E(R,S)</i> -1- $h_8$ | 6.28                                                                        |

*iii) HPLC (Chiral Stationary Phase) analysis condition Diol 4:*

HPLC : Hewlett-Packard Series 1100

Column : Chiralcel OD, Normal Phase

Program : 90:10 Hexanes:2-Propanol, Flow 0.5ml/min

*iv) Structure Matrix:*

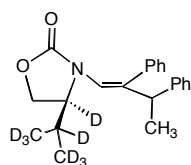

*Z*-1- $d_8$

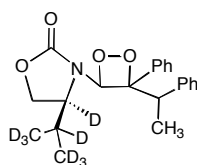

*Z*-2- $d_8$

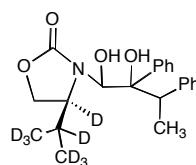

*Z*-3- $d_8$

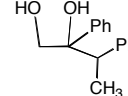

4

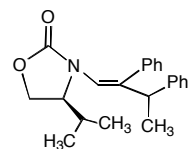

*Z*-1- $h_8$

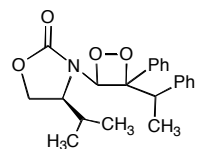

*Z*-2- $h_8$

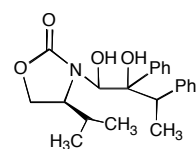

*Z*-3- $h_8$

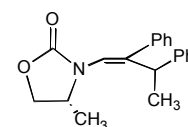

*E*-1- $h_4$

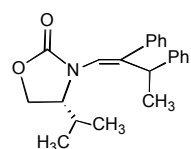

*E*-1- $h_8$

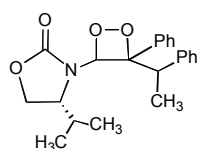

*E*-2- $h_8$

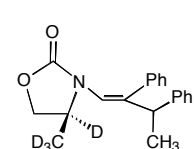

*Z*-1- $d_4$

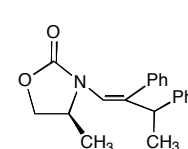

*Z*-1- $h_4$

*v) Summary results:*

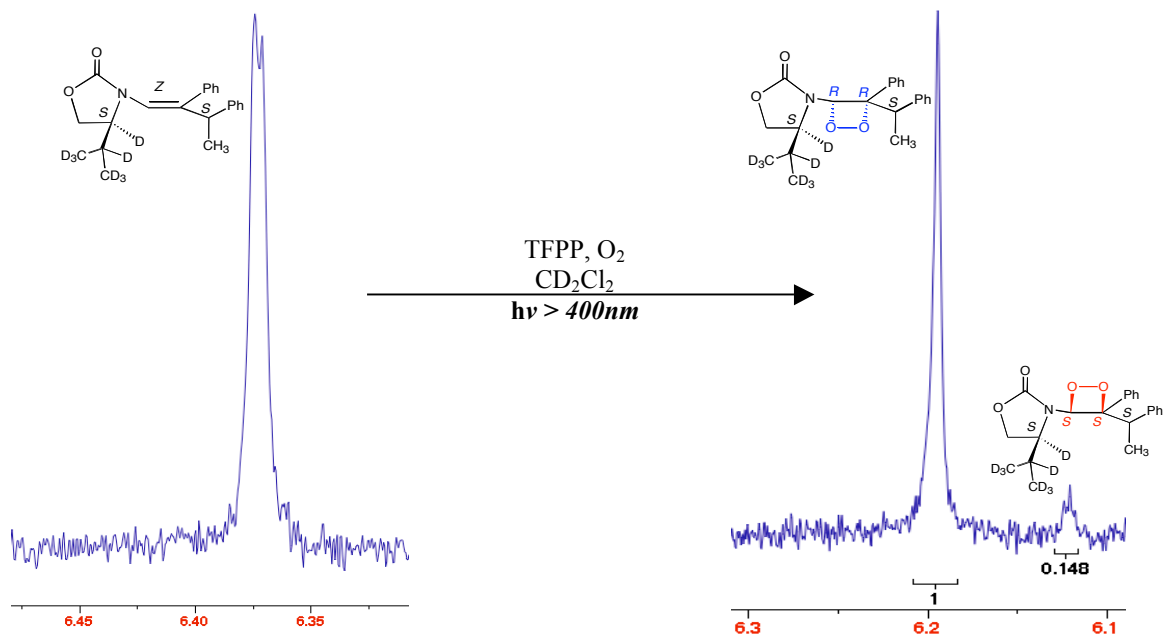

**Figure 1:** <sup>1</sup>H-NMR resulting from photooxygenation of enecarbamate *Z*(4*S*,3'*S*)-1-**d**<sub>8</sub> to dioxetane *Z*-2-**d**<sub>8</sub>. The reaction was carried out in CD<sub>2</sub>Cl<sub>2</sub> at -23°C using a 300W lamp and <400 nm cutoff filter. Two dioxetanes result from the reaction of the enecarbamate with <sup>1</sup>O<sub>2</sub> with an 80% *de* favoring the (1'*R*,2'*R*) diastereomer over the (1'*S*,2'*S*) diastereomer.

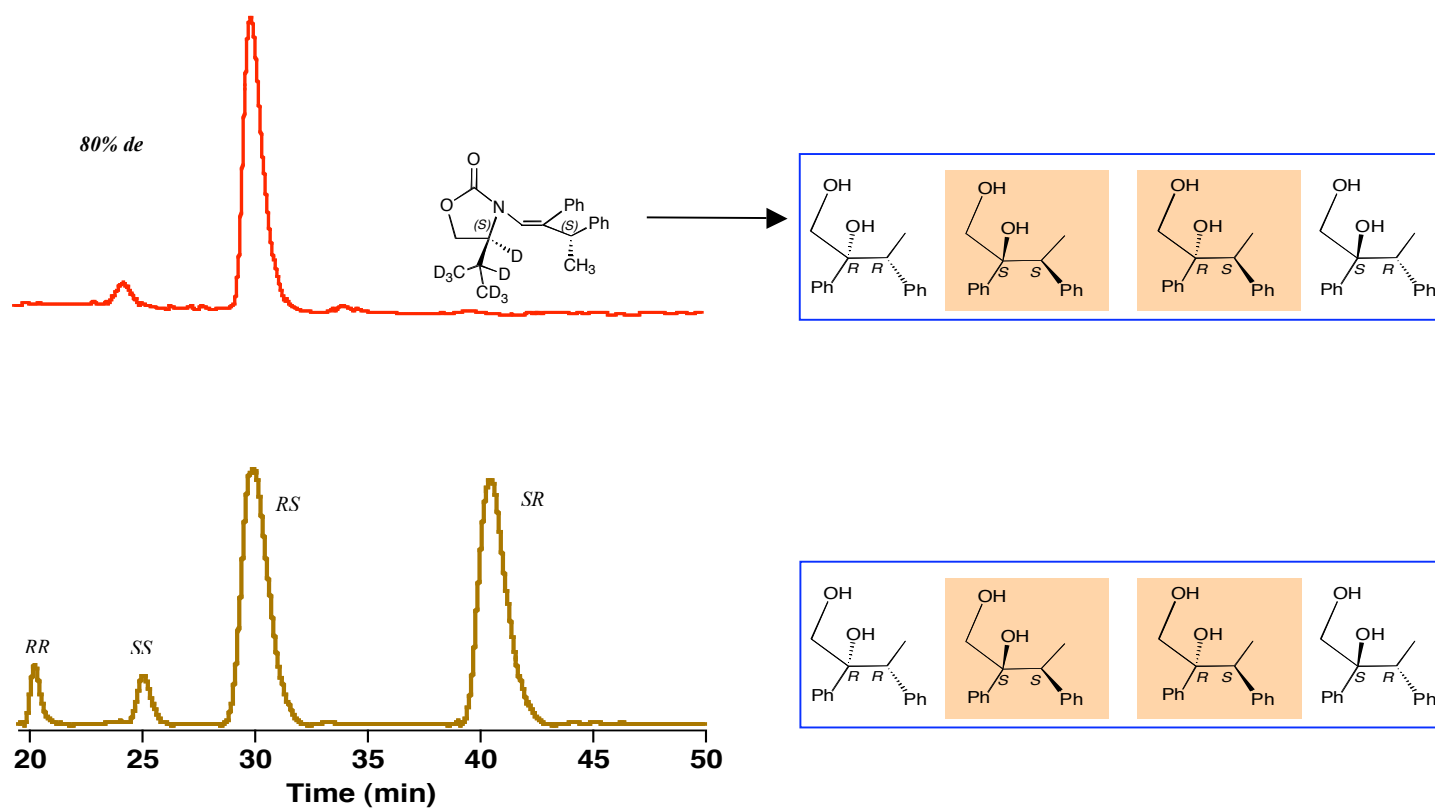

**Figure 2:** *Top:* HPLC trace of diols (4) resulting from the reduction of dioxetane Z-2-d<sub>8</sub> (obtained from photooxygenation of enecarbamate Z(4*S*,3'*S*)-1-d<sub>8</sub>) to diol Z-3-d<sub>8</sub> and the subsequent reaction with NaBH<sub>4</sub>/DBU. *Bottom:* HPLC trace of the four isomers of Diol 4.

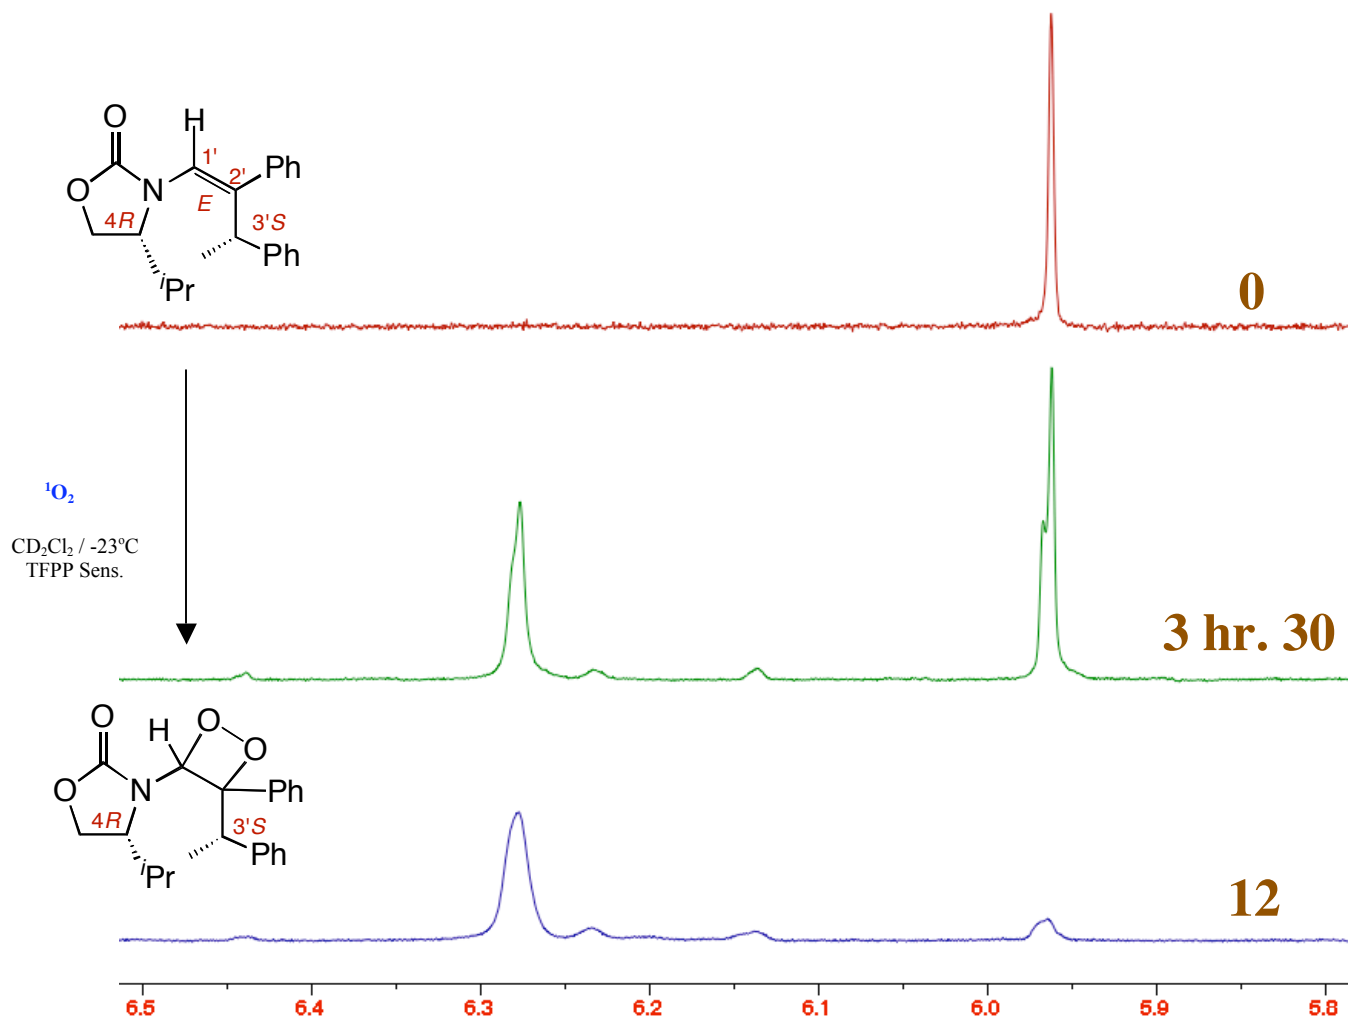

**Figure 3:**  $^1\text{H}$ -NMR spectra monitoring the photooxygenation of enencarbamate  $E(4R,3'S)\text{-1-h}_8$  to dioxetane  $E\text{-2-h}_8$  by the disappearance of the enencarbamate peak and the appearance of the dioxetane peak. The reaction was carried out in  $\text{CD}_2\text{Cl}_2$  at  $-23^\circ\text{C}$  using a 300W lamp and  $<400$  nm cutoff filter.

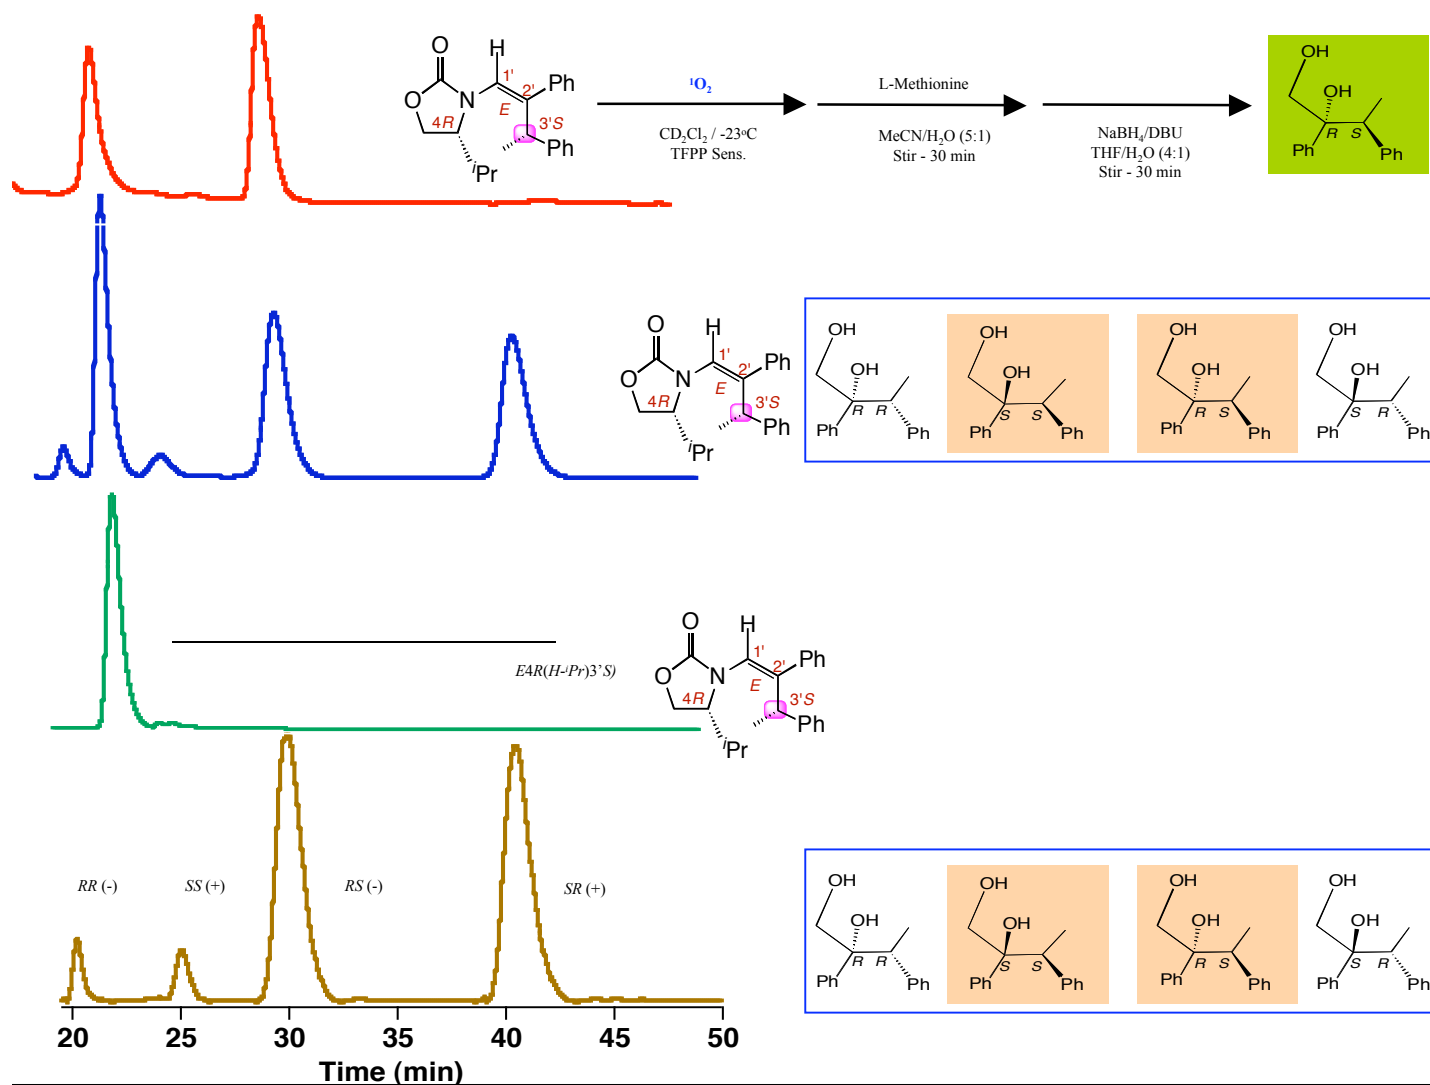

**Figure 4:** *Brown:* HPLC trace of the four isomers of Diol **4**. *Green:* HPLC trace of  $E(R,S)-1-h_8$ . *Blue:* HPLC trace for coinjection of  $E(R,S)-1-h_8$  and the four isomers of Diol **4**. *Red:* HPLC trace of diols (**4**) resulting from the reduction of dioxetane  $E-2-h_8$  (obtained from photooxygenation of enecarbamate  $E(R,S)-1-h_8$ ) to diol  $E-3-h_8$  and the subsequent reaction with  $NaBH_4/DBU$ .

---

*vi) Additional References:*

- Si* Poon, T.; Turro, N. J.; Chapman, J.; Lakshminarasimhan, P.; Lei, X.; Adam, W.; Bosio, S. G. *Org. Lett.* **2003**, *5*, 2025-28.
- Sii* For the synthesis procedure and the product characterizations of *Z* and *E* enecarbamates (**1**), Dioxetanes (**2**) and Diols **4**: a) Adam, W.; Bosio, S. G.; Turro, N. J.; *J. Am. Chem. Soc.* **2002**, *124*, 8814-5. b) Poon, T.; Sivaguru, J.; Franz, R.; Jockusch, S.; Martinez, C.; Washington, I.; Adam, W.; Inoue, Y.; Turro, N. J.; *J. Am. Chem. Soc.*; **2004**; *126*; 10498-10499. c) Sivaguru, J.; Poon, T.; Franz, R.; Jockusch, S.; Adam, W.; Turro, N. J.; *J. Am. Chem. Soc.*; **2004**; *126*; 10816-10817. d) Adam, W.; Bosio, S. G.; Turro, N. J., Wolff, B. T.; *J. Org. Chem.* **2004**, *69*, 1704-5.
- Siii* Hsiao, Y., Hegedus, L. S.; *J. Org. Chem.* **1997**, *62*, 3586-91.
